# Supplementary figures and images for: Internationellt utbyte och samarbete inom forskning och undervisning i skoglig mätteknik och inventering
Source: HighWire-hosted journal article supplement (doi:10.1136/jitc-2021-002836), 2003-10-01

### Training cohort

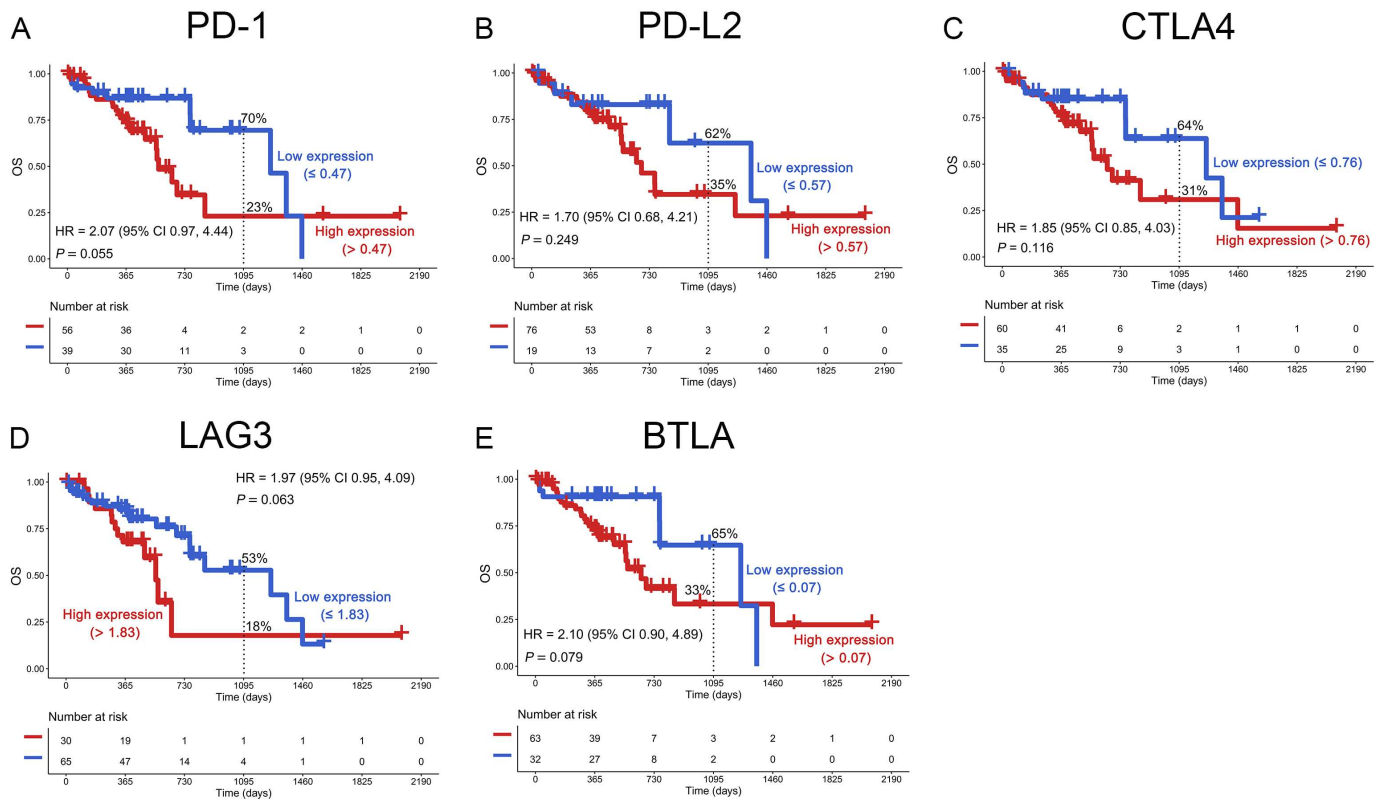

Supplement: jitc-2021-002836supp004_data_supplement.pdf [file jitc-2021-002836supp004_data_supplement.pdf]

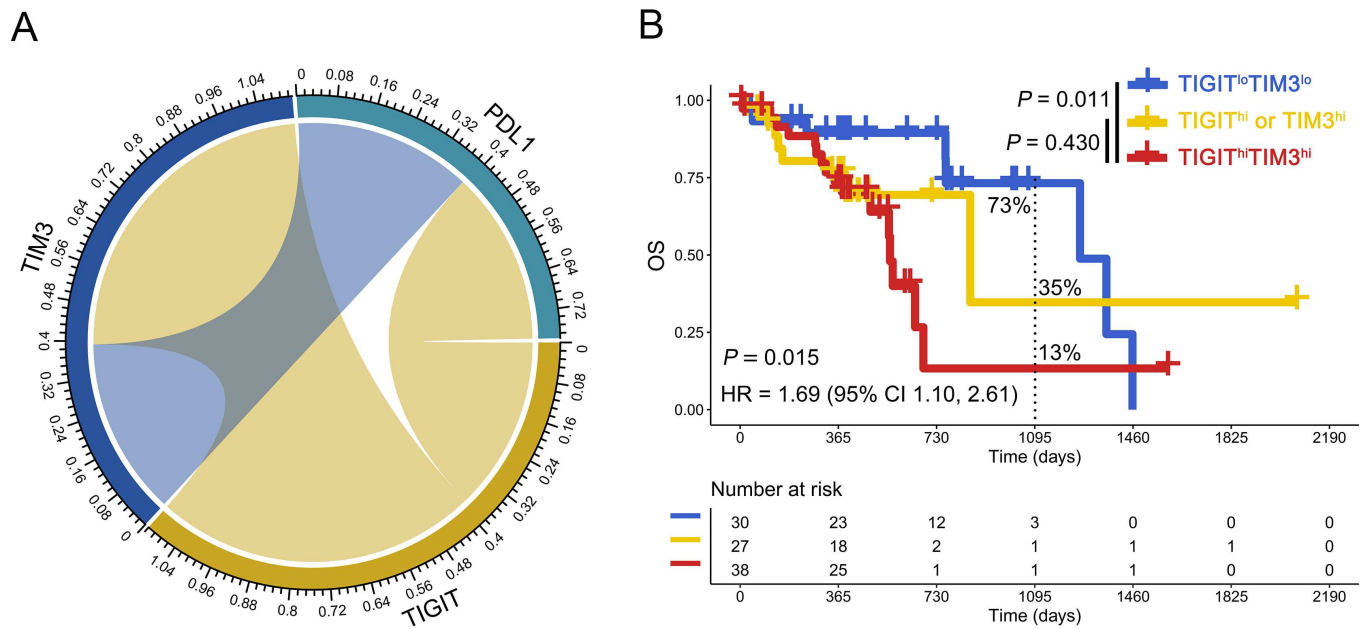

Supplement: jitc-2021-002836supp005_data_supplement.pdf [file jitc-2021-002836supp005_data_supplement.pdf]

## Training cohort

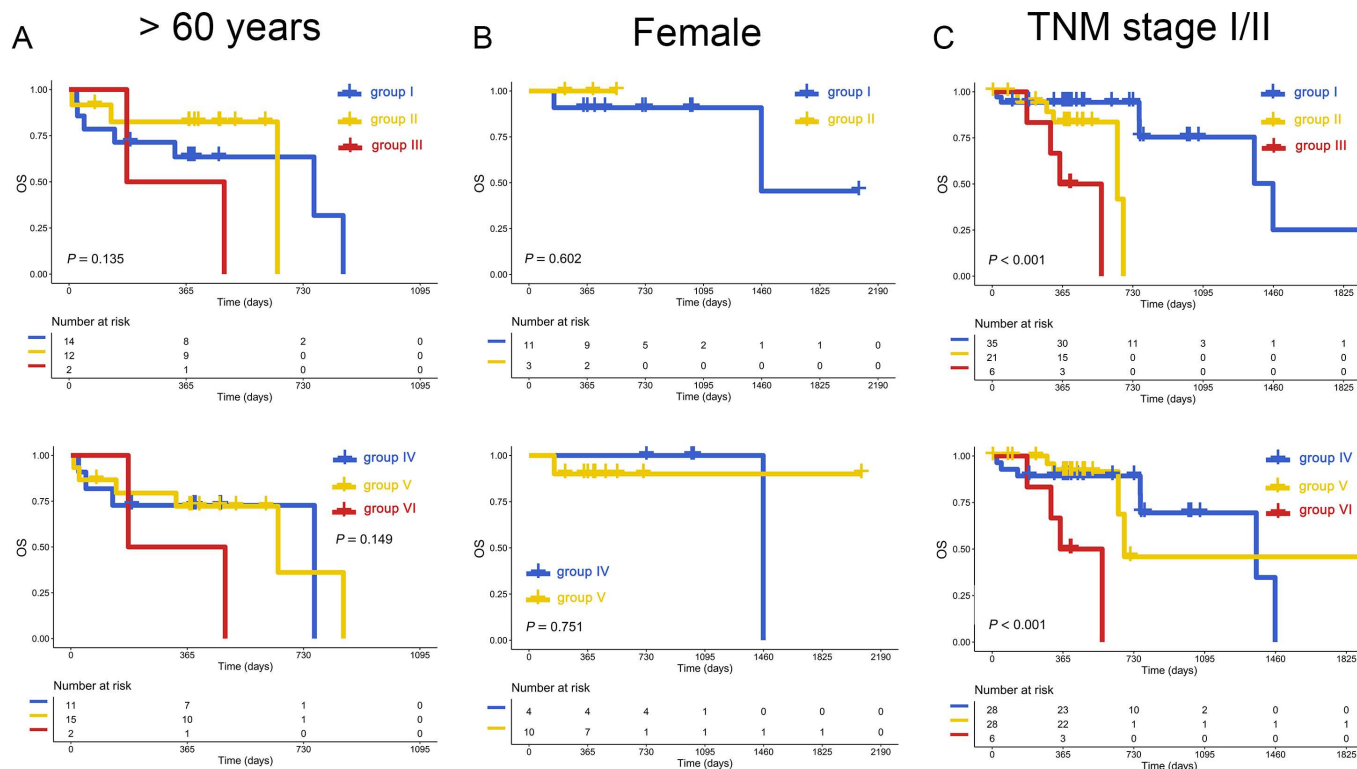

## Validation cohort

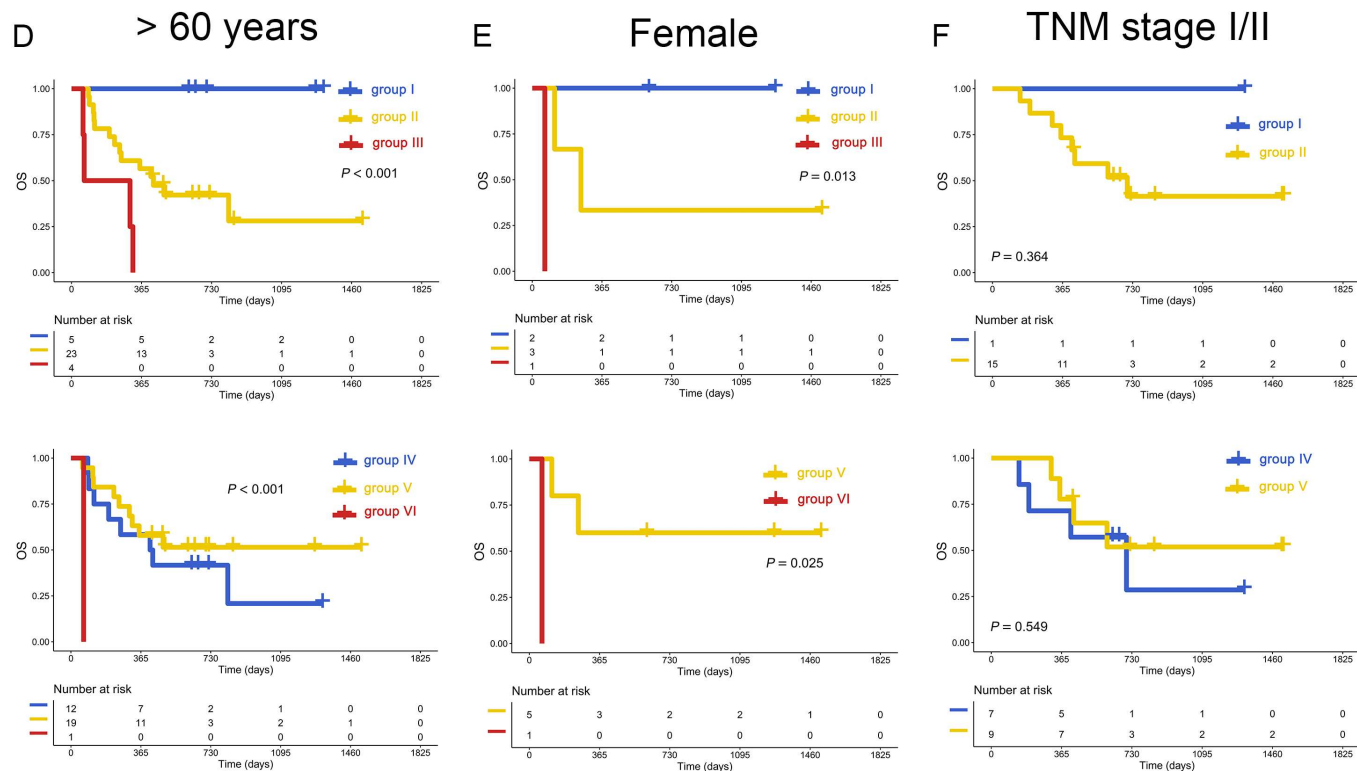

Supplement: jitc-2021-002836supp007_data_supplement.pdf [file jitc-2021-002836supp007_data_supplement.pdf]

A

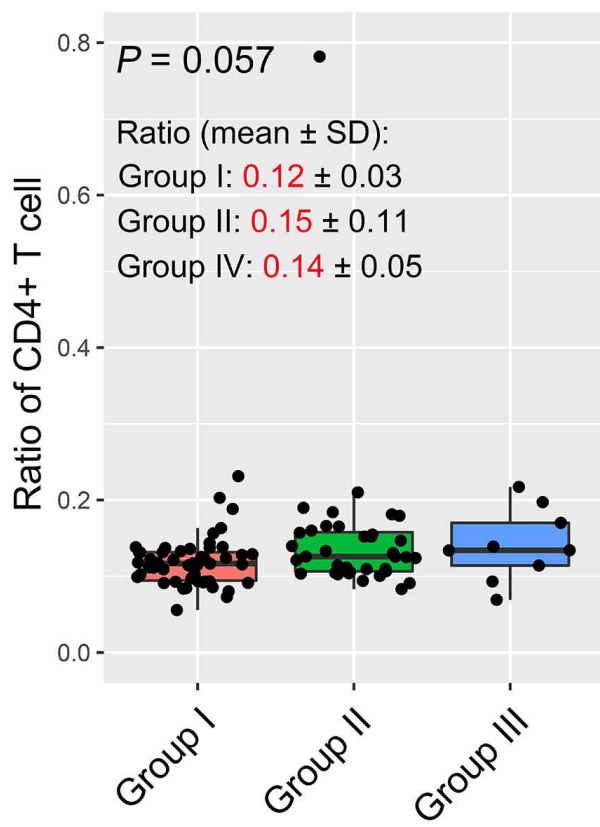

B

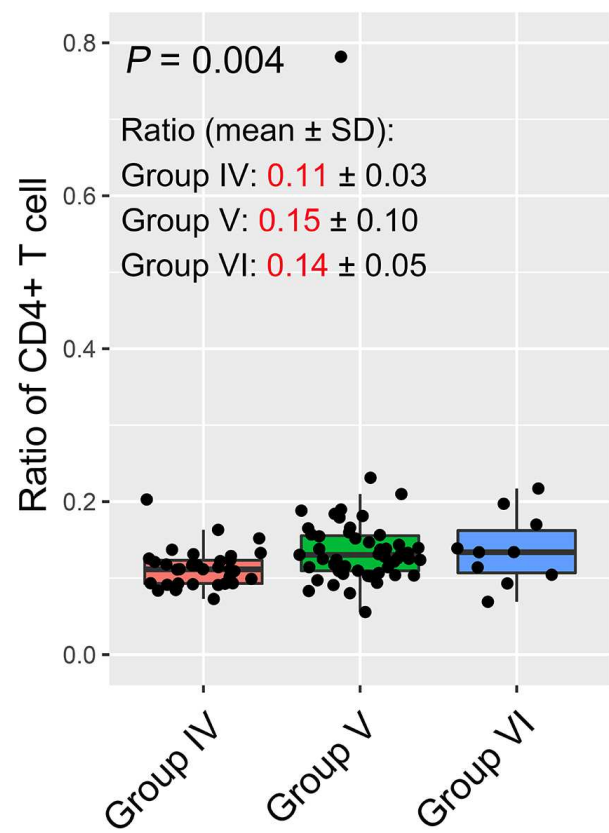

Supplement: jitc-2021-002836supp008_data_supplement.pdf [file jitc-2021-002836supp008_data_supplement.pdf]

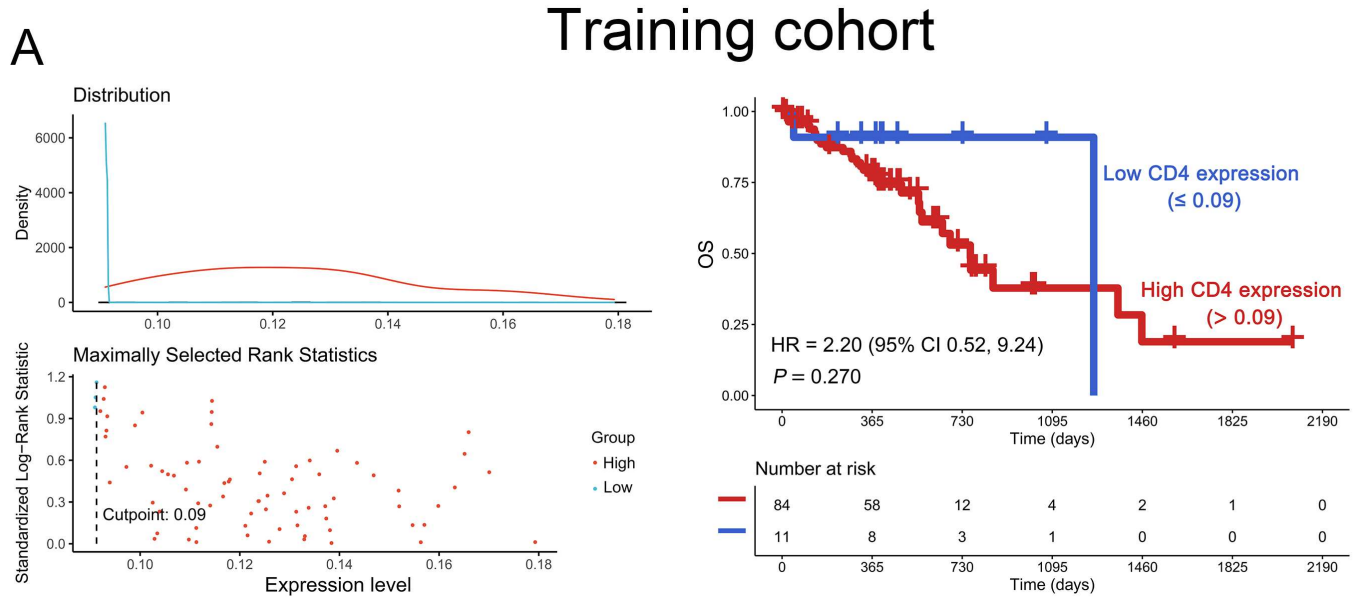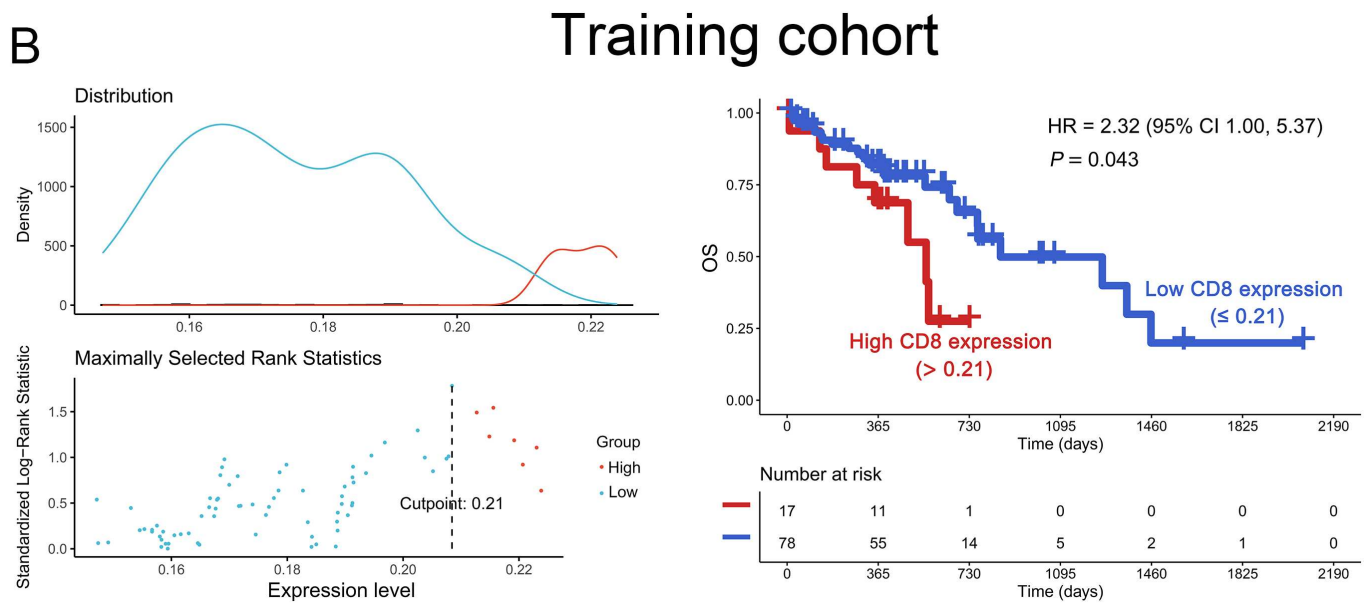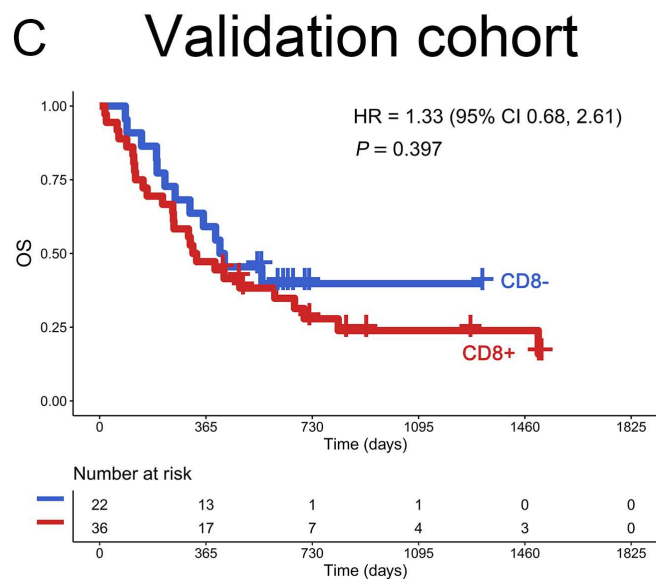

Supplement: jitc-2021-002836supp009_data_supplement.pdf [file jitc-2021-002836supp009_data_supplement.pdf]
